# Supplementary material
Source: PubMed Central journal article supplement (PMC3188321)

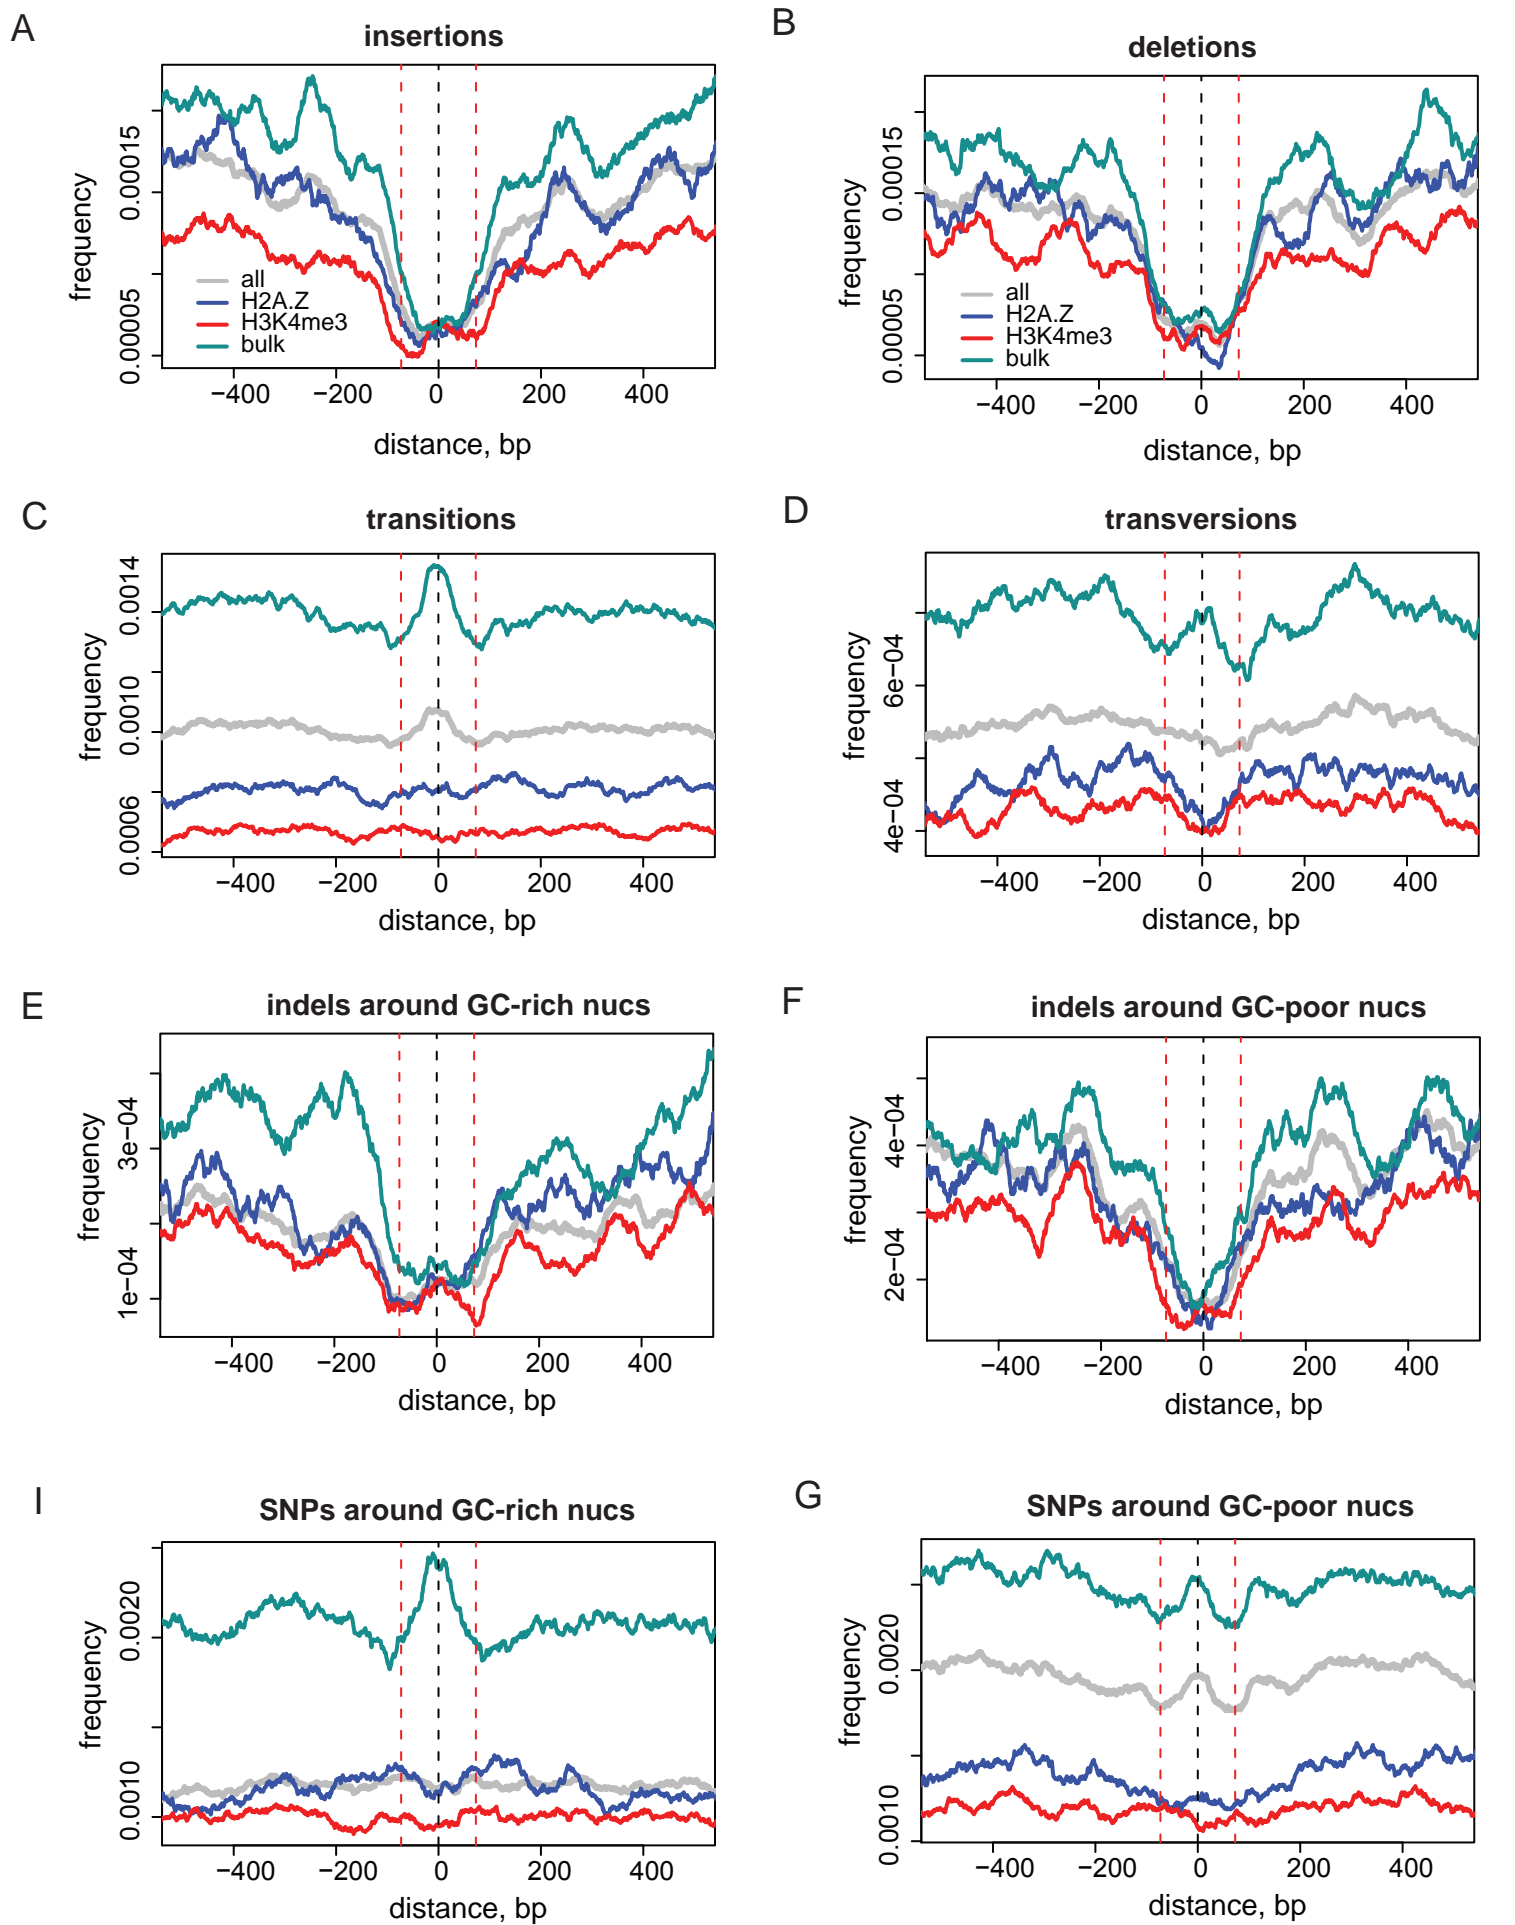

A

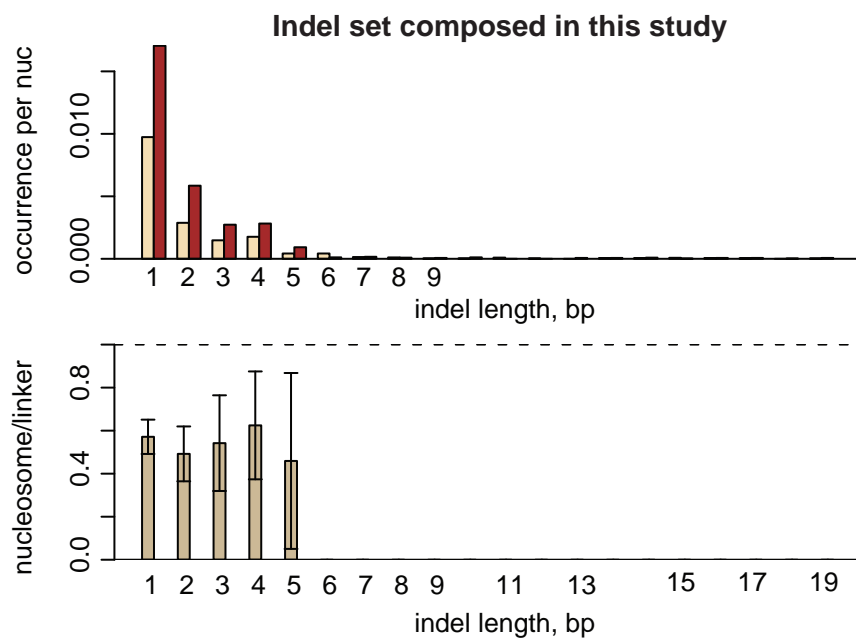

B

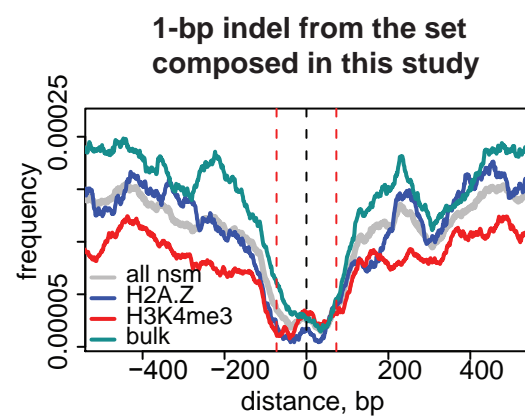

C

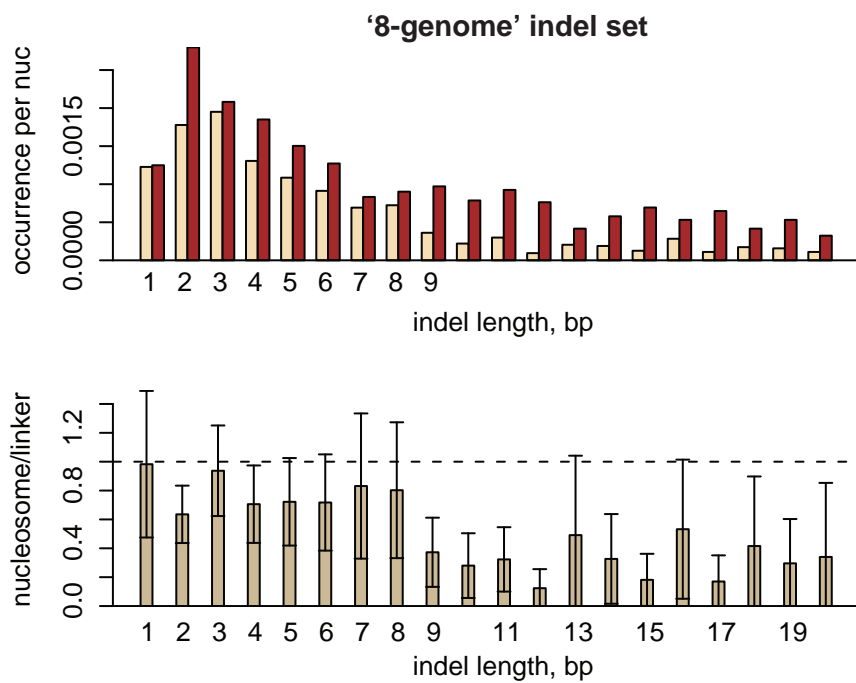

D

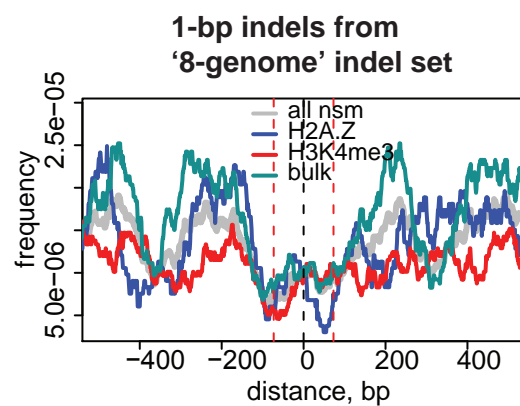

### SNPs and bulk nucleosomes around TSS

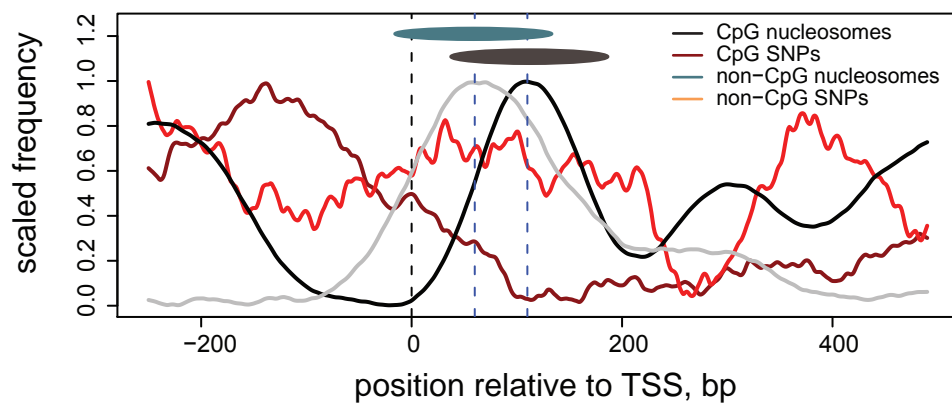

### SNPs supported by only one trace

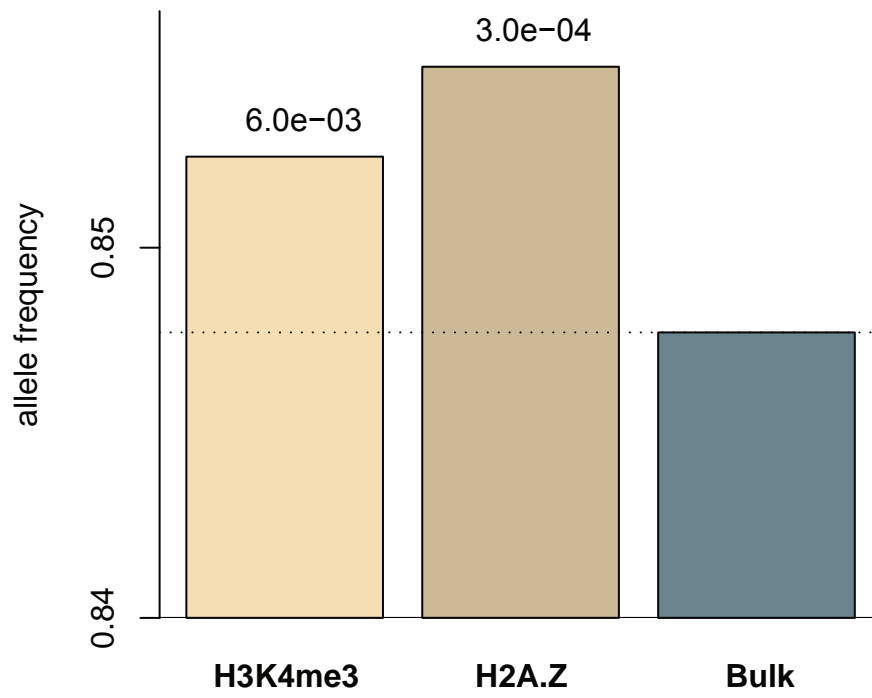

A

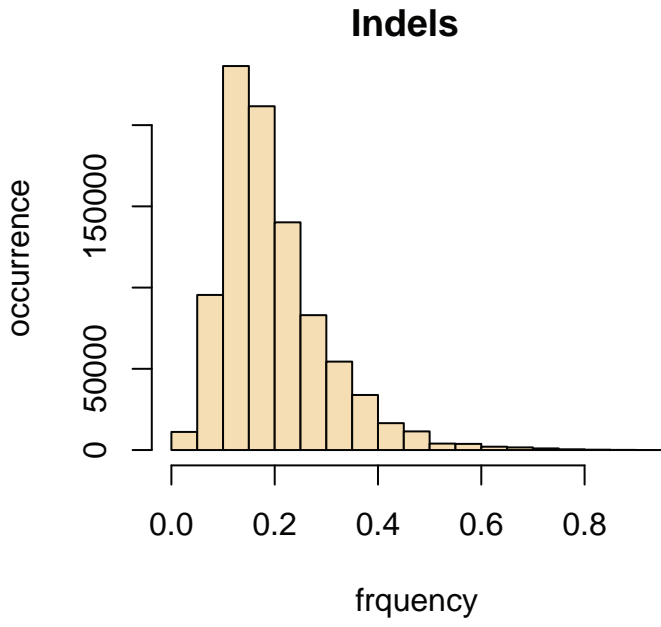

B

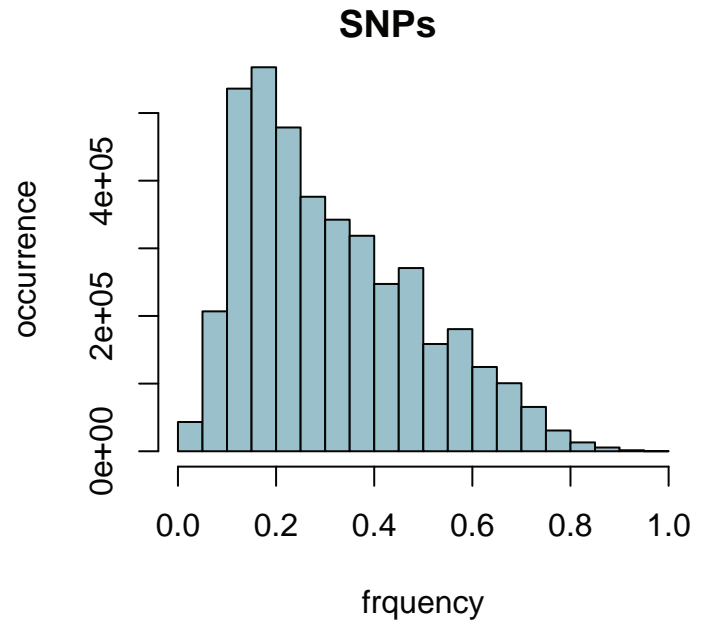

C

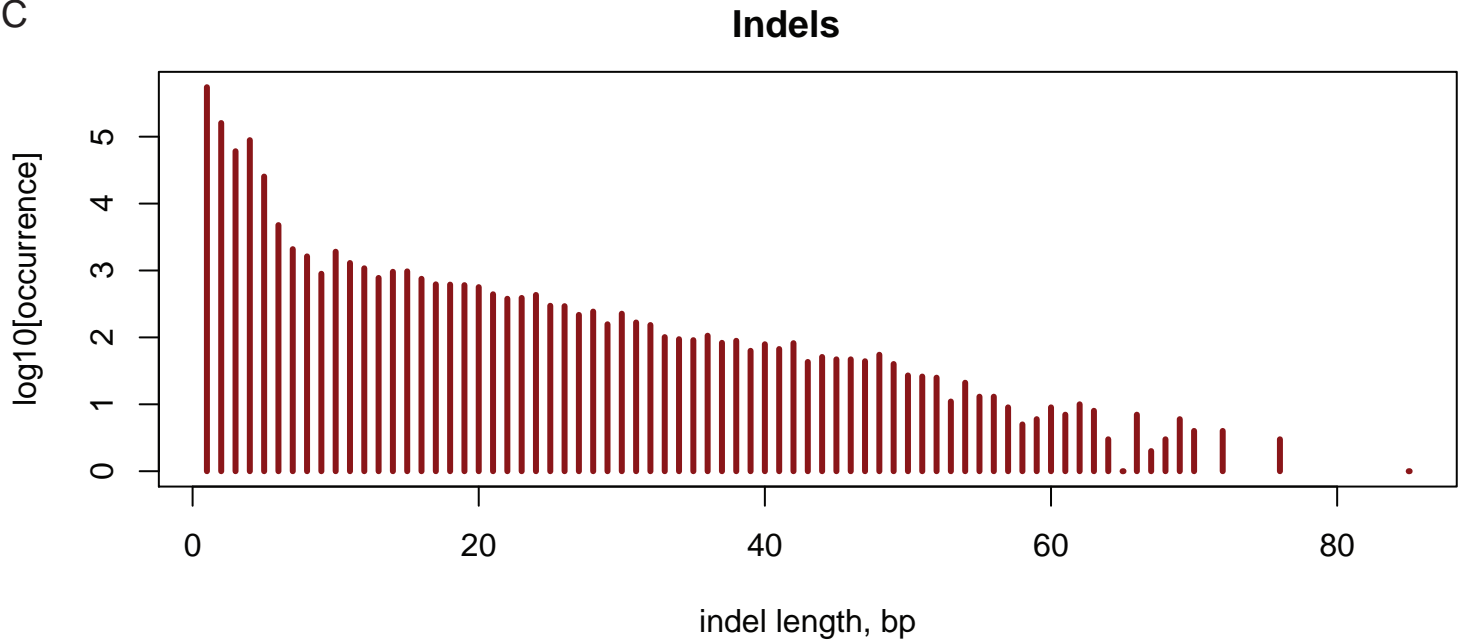

A

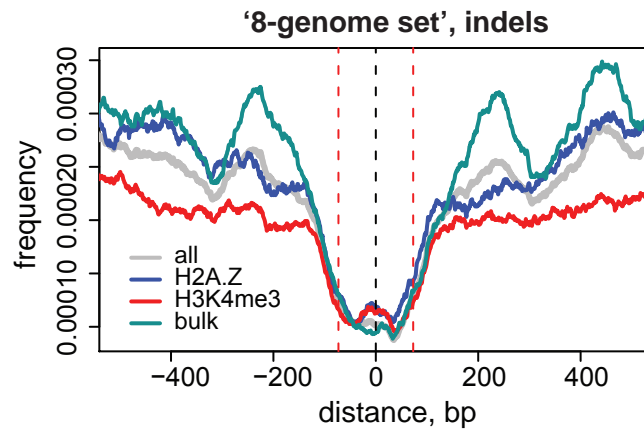

B

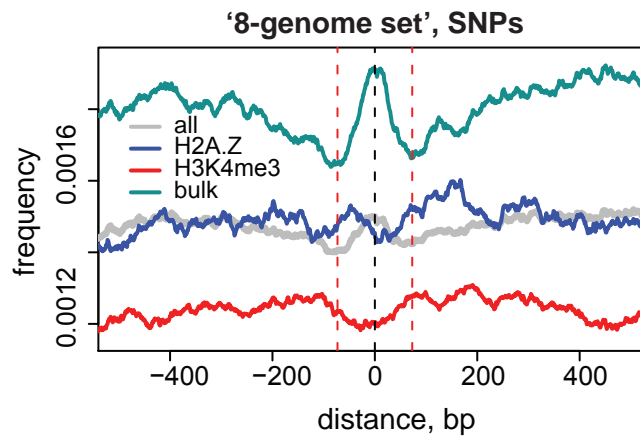

# '8-genome' set

A

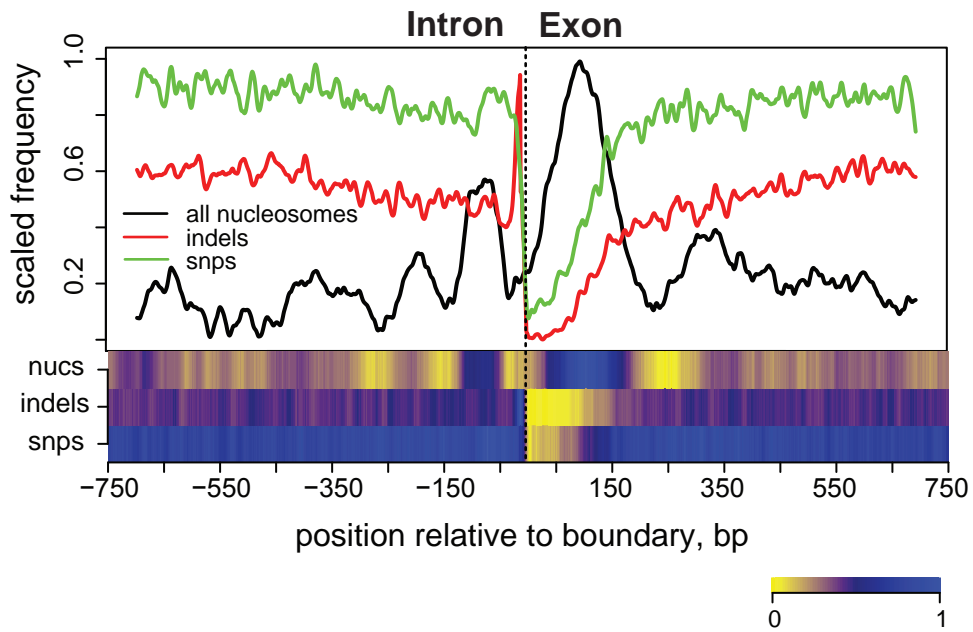

B

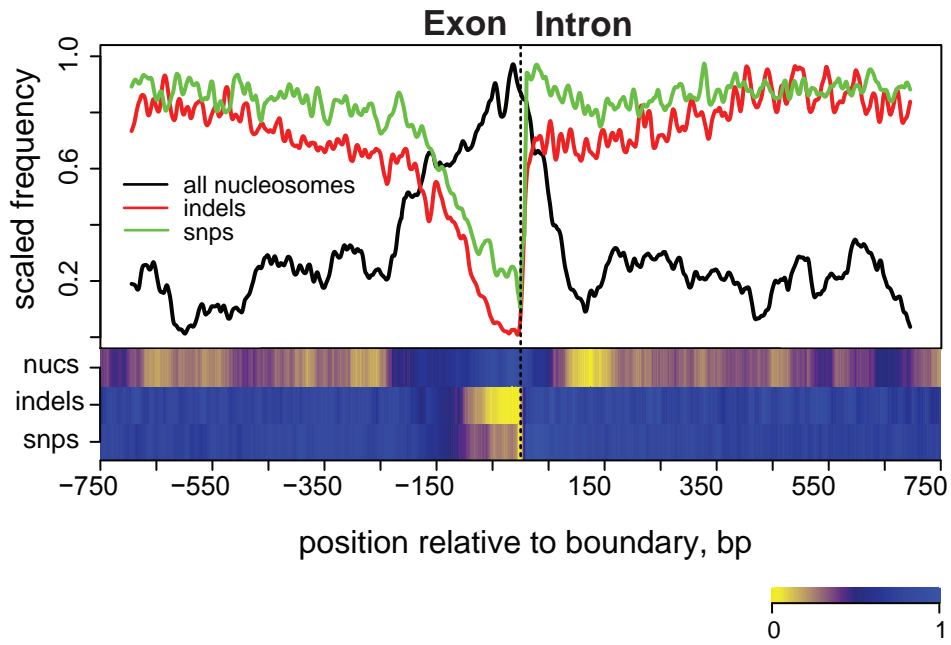

# '8-genome' set

A

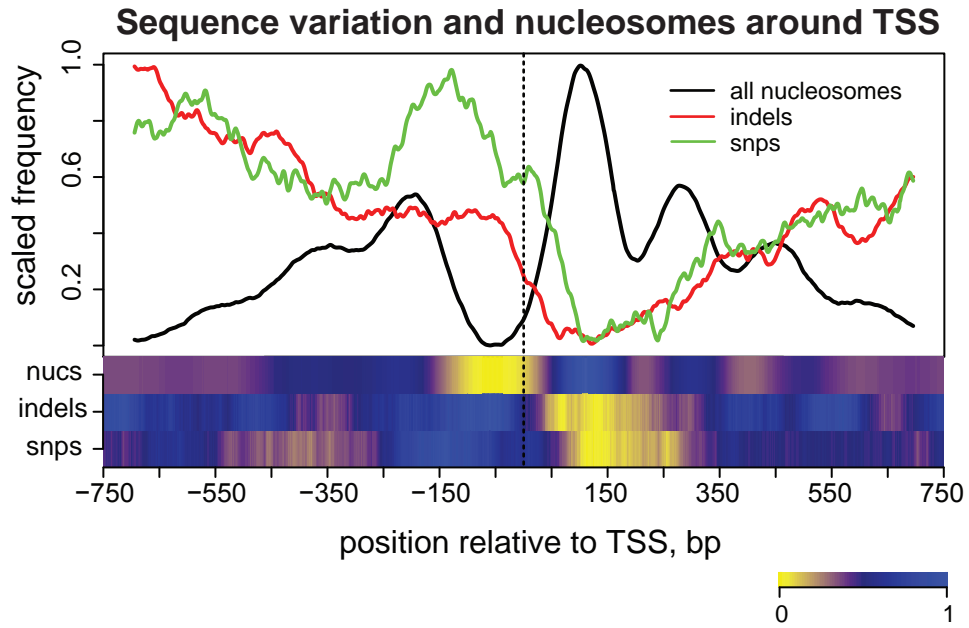

B

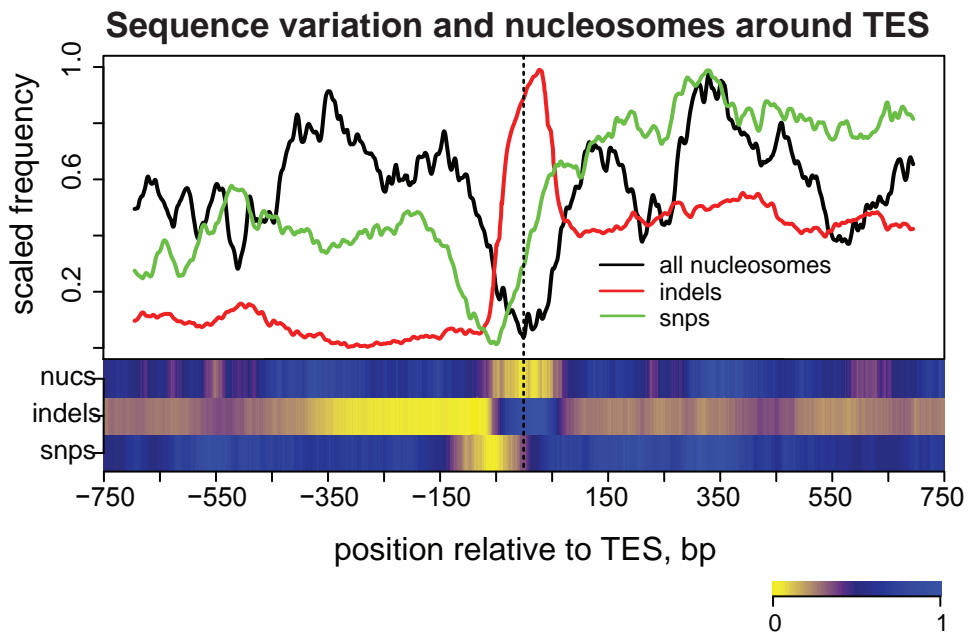



**A** This study set to '8-genome' set

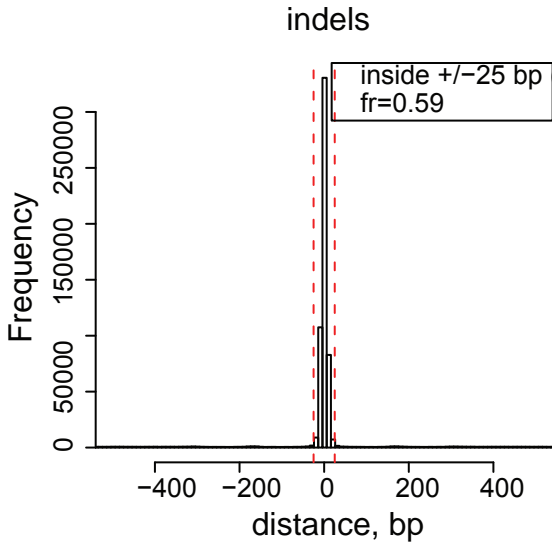

**C** '8-genome' set to this study set

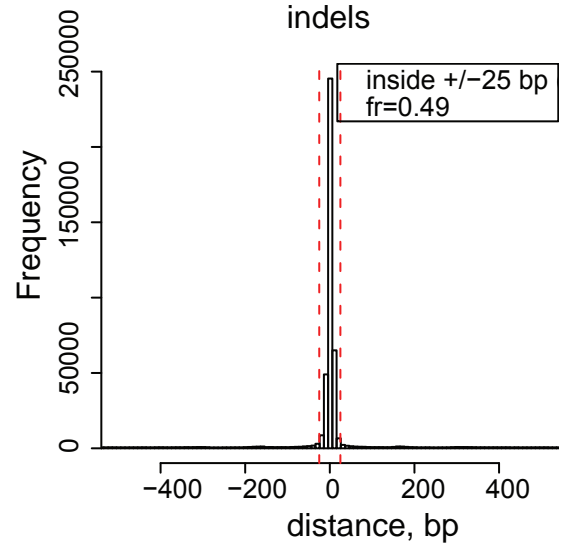

**B** This study set to '8-genome' set

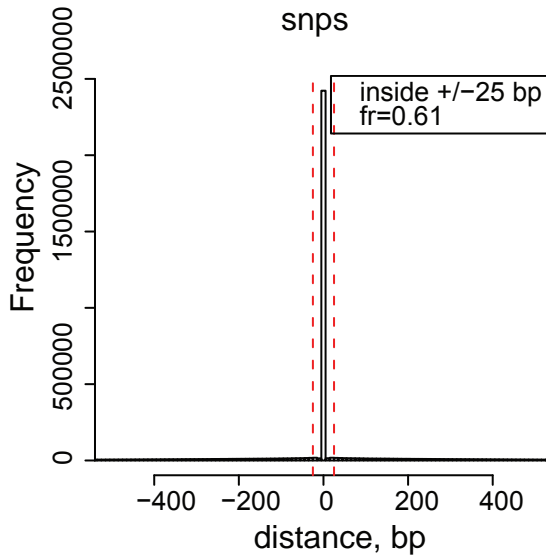

**D** '8-genome' set to this study set

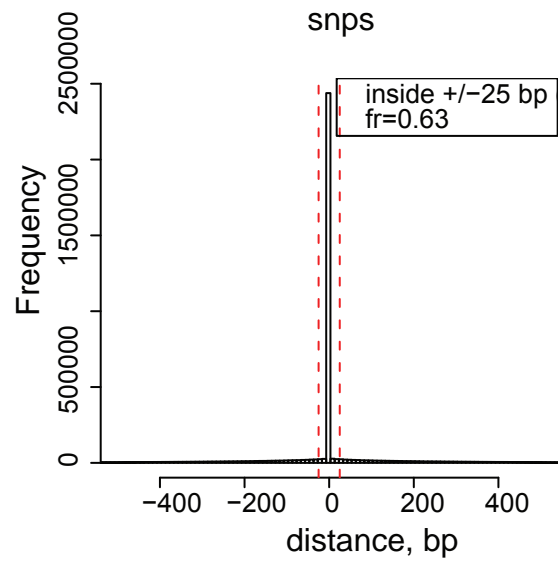

Supplement: NIHMS327269-supplement-Supplementary_Material_-_figures.pdf [file NIHMS327269-supplement-Supplementary_Material_-_figures.pdf]
